# Supplementary material for: Instrumentation-Free Semiquantitative Immunoanalysis Using a Specially Patterned Lateral Flow Assay Device
Source: MDPI journal article supplement (doi:10.3390/bios10080087), 2020-07-31

Supplementary information

## **Instrumentation-free semiquantitative immunoanalysis using a specially patterned lateral flow assay device**

Kyung Won Lee, Ye Chan Yu, Hyeong Jin Chun, Yo Han Jang, Yong Duk Han, and Hyun C. Yoon\*

*Department of Molecular Science and Technology, Ajou University, Suwon 16499, South Korea*

\* Author to whom correspondence should be addressed:

E-mail: [hcyoon@ajou.ac.kr](mailto:hcyoon@ajou.ac.kr)

**Figure S1.** (A) Absorbance spectrum of the synthesized AuNP solution. (B) Image and absorbance spectrum of the AuNP solution containing various concentrations of antibodies and a high concentration of NaCl.

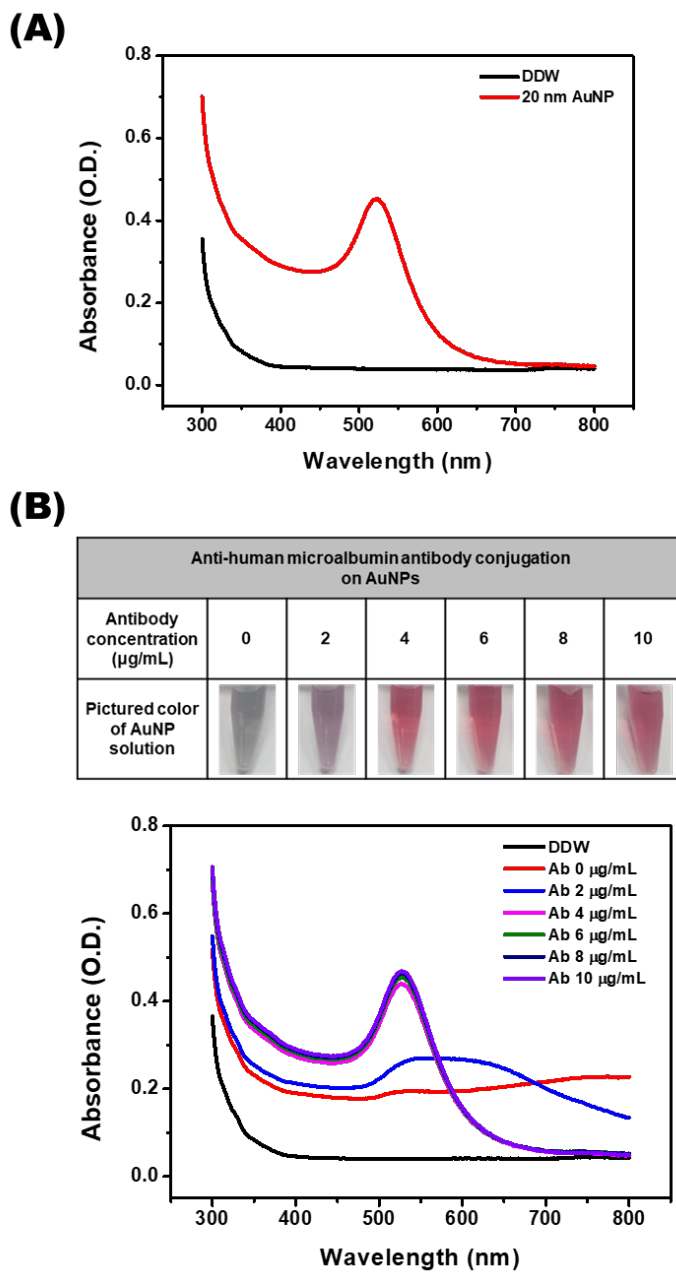

**Figure S2.** Schematic diagrams of the SQ-LFI fabrication and operation. (A) Preparation of the SQ-LFI strip. (B) Operation procedures of the SQ-LFI.

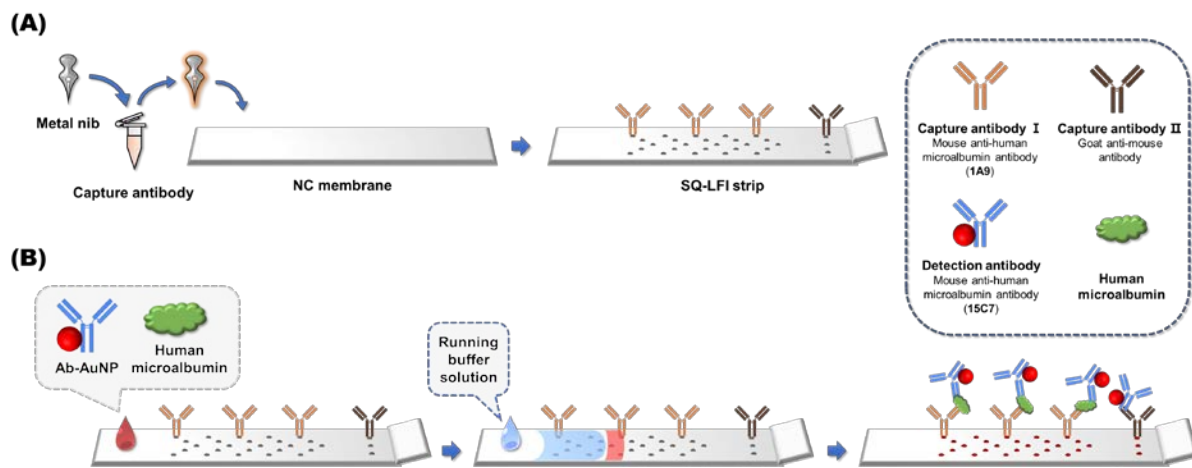

Supplement: s1 [file s1]
